# Supplementary material
Source: Springer Nature journal article supplement (https://www.springermedizin.de/resource/supplementary/12865_2006_93_MOESM6_ESM.pdf/9428562)

# A Cross-Recognition of Gag epitopes among the peptide sets

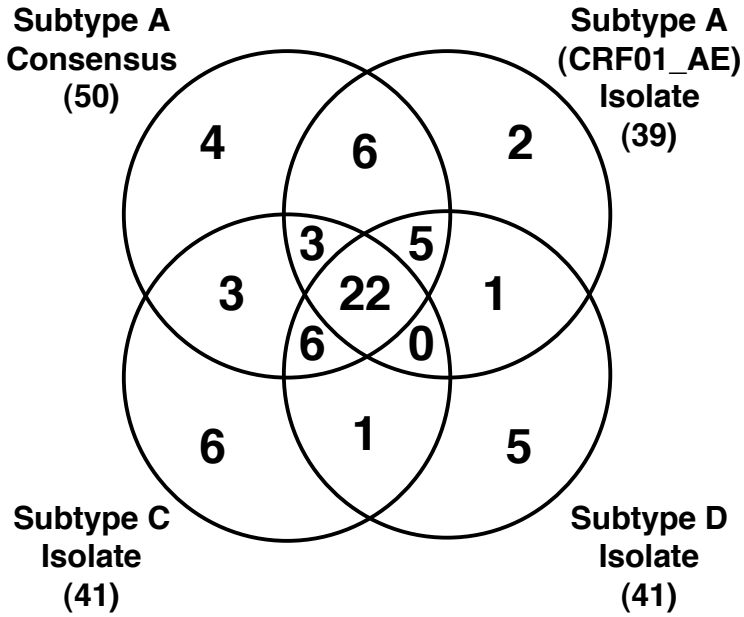

\* 1 response shared between Consensus A and Isolate D

# B Cross-Recognition of Nef epitopes among the peptide sets

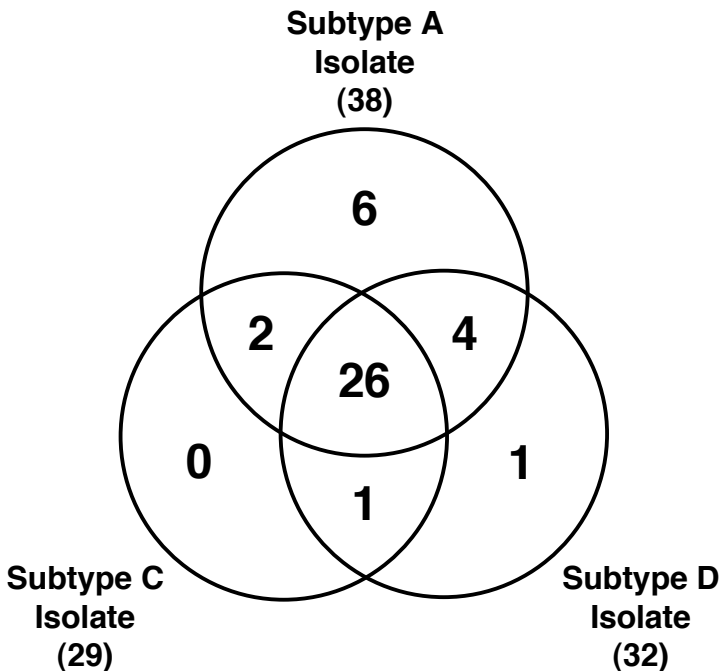

Supplement: MOESM6 [file 9428562]
